# Supplementary material for: Searching for the Predictors of Response to BoNT-A in Migraine Using Machine Learning Approaches
Source: MDPI journal article supplement (doi:10.3390/toxins15060364), 2023-05-29
Supplement: s1 [file tableS1_4th_cycle_def.xlsx]

## Sheet: riassunto
Machine learning Methods	ACC (%)	Sens (%)	Spec (%)	AUC (%)	N features	Features
PRIMARY ENDPOINT - migraine days reduction
Random Forest	100	100	100	16.67	12	epilepsy_new_onset
						asc-12_baseline
						migraine_days_1_trimester
						abortive_drug_1_trimester
						date_reduction_between_1trimester_vs_BonT_A_dose
						migraine_days_reduction_between_1trimester_vs_trimester
						abortive_drug_reduction_between_1trimester_vs_trimester
						day_abortive_intake_reduction_between_1trimester_vs_trimester
						migraine_days_reduction_reduction_between_1trimester_vs_baseline
						headache_days_reduction_between_1trimester_vs_baseline
						headache_days_reduction_between_1trimester_vs_baseline%
						abortive_dose_reduction_between_1trimester_vs_baseline%
SVM (linear kernel)	76.67	63.33	90	23.33	3	headache_days_reduction_between_1trimester_vs_baseline
						migraine_diagnosis_age
						migraine_days_reduction_between_1trimester_vs_trimester
SVM (RBF kernel)	76.67	70	83.33	23.33	2	migraine_diagnosis_age
						migraine_days_reduction_reduction_between_1trimester_vs_baseline
ANFIS (aNN)	50	100	0	20	1	headache_days_reduction_between_1trimester_vs_baseline
MLP (aNN)	85	90	80	15	2	migraine_diagnosis_age
						headache_days_reduction_between_1trimester_vs_baseline
Fuzzy clustering (unsup. ML)	45	90	0	86.67	2	migraine_diagnosis_age
						headache_days_reduction_between_1trimester_vs_baseline
SECONDARY ENDPOINT - abortive medication intake reduction
Random Forest	100	100	100	33	8	migraine_type_prior_to_CM
						oPreventive_drugioid_use_as_abortive
						therapy_benzodiazepine_added_not_for_headache
						Preventive_drug_antidepressant
						Preventive_drug_calcium_channel_blocker
						day_abortive_intake_baseline
						antiepileptic_drugs_used_not _for_migraine
						other_drug_used_for _other_reasons
SVM (linear kernel)	83.33	76.67	90	16.67	4	day_abortive_intake_baseline
						antiepileptic_drugs_used_not _for_migraine
						migraine_type_prior_to_CM
						other_drug_used_for _other_reasons
SVM (RBF kernel)	83.33	83.33	83.33	16.67	5	day_abortive_intake_baseline
						migraine_type_prior_to_CM
						other_drug_used_for _other_reasons
						anamnesis_anxiety
						antiepileptic_drugs_used_not _for_migraine
ANFIS (aNN)	50	100	0	21.67	1	day_abortive_intake_baseline
MLP (aNN)	81.67	83.33	80	18.33	3	day_abortive_intake_baseline
						migraine_type_prior_to_CM
						other_drug_used_for _other_reasons
Fuzzy clustering (unsup. ML)	48.33	96.67	0	56.67	4	day_abortive_intake_baseline
						anamnesis_anxiety
						other_drug_used_for _other_reasons
						abortive_drug_dose_baseline
SECONDARY ENDPOINT - reduction of days in which an abortive medication is required
Random Forest	100	100	100	12.12	12	migraine_type_prior_to_CM
						anamnesis_anxiety
						MIDAS_1_trimester
						migraine_days_reduction_between_1trimester_vs_trimester
						headache_days_reduction_between_1trimester_vs_trimester
						abortive_drug_reduction_between_1trimester_vs_trimester
						day_abortive_intake_reduction_between_1trimester_vs_trimester
						migraine_days_reduction_between_1trimester_vs_baseline%
						headache_days_reduction_between_1trimester_vs_baseline
						headache_days_reduction_between_1trimester_vs_baseline%
						abortive_dose_reduction_between_1trimester_vs_baseline
						medication_days_reduction_between_1trimester_vs_baseline
SVM (linear kernel)	88.33	76.67	100	11.67	5	medication_days_reduction_between_1trimester_vs_baseline
						headache_days_reduction_between_1trimester_vs_baseline%
						day_abortive_intake_reduction_between_1trimester_vs_trimester
						migraine_days_reduction_between_1trimester_vs_trimester
						migraine_type_prior_to_CM
SVM (RBF kernel)	75	90	60	25	3	medication_days_reduction_between_1trimester_vs_baseline
						day_abortive_intake_reduction_between_1trimester_vs_trimester
						migraine_type_prior_to_CM
ANFIS (aNN)*	-	-	-	-	-
MLP (aNN)	88.33	80	86.67	16.67	4	migraine_days_reduction_between_1trimester_vs_trimester
						headache_days_reduction_between_1trimester_vs_trimester
						migraine_type_prior_to_CM
						medication_days_reduction_between_1trimester_vs_baseline
Fuzzy clustering (unsup. ML)	50	100	0	50	1	medication_days_reduction_between_1trimester_vs_baseline
EXPLORATORY ENDPOINT - MIDAS reduction
Random Forest	100	100	100	27.27	2	day_drug_use_reduction_between_1trimester_vs_baseline%
						midas_reduction_between_1trimester_vs_baseline%
SVM (linear kernel)	85	80	90	15	3	anamnesis_mood_disorder
						MIDAS_reduction_between_1trimester_vs_baseline
						day_drug_use_reduction_between_1trimester_vs_baseline%
SVM (RBF kernel)	67.5	55	80	32.5	1	midas_reduction_between_1trimester_vs_baseline%
ANFIS (aNN)*	-	-	-	-	-
MLP (aNN)	85	85	85	15	2	day_drug_use_reduction_between_1trimester_vs_baseline%
						midas_reduction_between_1trimester_vs_baseline%
Fuzzy clustering (unsup. ML)	47.5	95	0	57.5	1	other_drug_used_for _other_reasons
