# Supplementary material for: Searching for the Predictors of Response to BoNT-A in Migraine Using Machine Learning Approaches
Source: MDPI journal article supplement (doi:10.3390/toxins15060364), 2023-05-29
Supplement: s1 [file tableS2_full_population_def.xlsx]

## Sheet: riassunto
Machine learning Methods	ACC (%)	Sens (%)	Spec (%)	AUC (%)	N features	Features
PRIMARY ENDPOINT - migraine days reduction
Random Forest	84.27	92.59	71.42	89.42	24	oPreventive_drugioid_use_as_abortive
						anamnesis_low_back_pain
						anamnesis_hypertension
						therapy_antidepressant_ongoing_at_baseline_not_for_headache
						migraine_days_baseline
						abortive_drug_dose_baseline
						asc-12_baseline
						migraine_days_1_trimester
						headache_days_1_trimester
						abortive_drug_1_trimester
						day_abortive_intake_1_trimester
						MIDAS_1_trimester
						HIT6_1_trimester
						asc-12_1trimester
						date_reduction_between_1trimester_vs_BonT_A_dose
						antiepileptic_drugs_used_not _for_migraine
						migraine_days_reduction_between_1trimester_vs_baseline%
						headache_days_reduction_between_1trimester_vs_baseline%
						abortive_dose_reduction_between_1trimester_vs_baseline%
						medication_days_reduction_between_1trimester_vs_baseline
						MIDAS_reduction_between_1trimester_vs_baseline
						HIT_reduction_between_1trimester_vs_baseline
						hit1_reduction_between_1trimester_vs_baseline%
						asc_reduction_between_1trimester_vs_baseline
SVM (linear kernel)	81.67	76.67	86.67	18.33	1	migraine_days_1_trimester
ANFIS (aNN)	50	100	0	35	1	Preventive_drug_other
Fuzzy clustering (unsup. ML)	48.33	96.67	0	81.67	4	headache_days_1_trimester
						migraine_days_1_trimester
						Preventive_drug_antidepressant
						HIT6_1_trimester
SECONDARY ENDPOINT - abortive medication intake reduction
Random Forest	73.68	81.48	63.41	82.48	12	concomitant_headache_disorder
						oPreventive_drugioid_use_as_abortive
						anamnesis_anxiety
						anamnesis_low_back_pain
						Preventive_drug_antidepressant
						Preventive_drug_anti_CGRP
						Preventive_drug_other
						total_Preventive_drug
						migraine_days_baseline
						headache_days_baseline
						abortive_drug_dose_baseline
						day_abortive_intake_baseline
SVM (linear kernel)	75	85	65	25	5	Preventive_drug_antidepressant
						Preventive_drug_other
						Preventive_drug_beta_blocker
						Preventive_drug_ARD
						total_Preventive_drug
ANFIS (aNN)	50	100	0	33.75	1	Preventive_drug_other
Fuzzy clustering (unsup. ML)	40	80	0	67.5	3	Preventive_drug_other
						Preventive_drug_antidepressant
						Preventive_drug_beta_blocker
SECONDARY ENDPOINT - reduction of days in which an abortive medication is required
Random Forest	72.83	81.48	60.52	79.68	8	Medication_overuse
						Preventive_drug_antidepressant
						Preventive_drug_other
						total_Preventive_drug
						migraine_days_baseline
						headache_days_baseline
						abortive_drug_dose_baseline
						day_abortive_intake_baseline
SVM (linear kernel)	71.67	80	63.33	28.33	4	Preventive_drug_other
						concomitant_headache_disorder
						Preventive_drug_antidepressant
						migraine_days_baseline
ANFIS (aNN)	50	100	0	33.33	1	Preventive_drug_other
Fuzzy clustering (unsup. ML)	70	100	40	60	1	Preventive_drug_antidepressant
EXPLORATORY ENDPOINT - MIDAS reduction
Random Forest	70	72.92	63.04	76.53	10	Medication_overuse
						oPreventive_drugioid_use_as_abortive
						anamnesis_hypertension
						therapy_benzodiazepine_ongoingat_baseline
						therapy_benzodiazepine_added_not_for_headache
						Preventive_drug_other
						total_Preventive_drug
						migraine_days_baseline
						headache_days_baseline
						abortive_drug_dose_baseline
SVM (linear kernel)	78.75	82.5	75	21.25	5	Preventive_drug_calcium_channel_blocker
						Preventive_drug_other
						migraine_days_baseline
						headache_days_baseline
						anamnesis_low_back_pain
ANFIS (aNN)	50	100	0	35	1	Preventive_drug_other
Fuzzy clustering (unsup. ML)	48.33	80	0	81.67	4	headache_days_1_trimester
						migraine_days_1_trimester
						Preventive_drug_antidepressant
						HIT6_1_trimester
