# Supplementary material for: Searching for the Predictors of Response to BoNT-A in Migraine Using Machine Learning Approaches
Source: MDPI journal article supplement (doi:10.3390/toxins15060364), 2023-05-29
Supplement: s1 [file tableS3_validation_4features_def.xlsx]

## Sheet: Primary ENDP
Machine learning method	ACC (%)	Sens (%)	Spec (%)	AUC (%)	N features	Model (of features)
PRIMARY ENDPOINT - migraine days reduction
Random Forest	53.42	60.53	45.71	58.27	4	oppioid_use_as_abortive
						anxiety_new_onset
						migraine_days_baseline
						MIDAS_baseline
SVM (RBF kernel)	58.33	63.33	53.33	41.67	2	oppioid_use_as_abortive
						anxiety_new_onset
SVM (linear kernel)	51.67	53.33	50	48.33	1	oppioid_use_as_abortive
ANFIS (aNN)	50	100	0	61.67	1	anxiety_new_onset
MLP (aNN)	55	43.33	66.67	45	3	oppioid_use_as_abortive
						anxiety_new_onset
						MIDAS_baseline
Fuzzy clustering (unsup. ML)	46.67	93.33	0	50	1	anxiety_new_onset
