# Supplementary material for: Searching for the Predictors of Response to BoNT-A in Migraine Using Machine Learning Approaches
Source: MDPI journal article supplement (doi:10.3390/toxins15060364), 2023-05-29
Supplement: s1 [file tableS4_literature.pdf › tableS4_literature.pdf]

|                                                                       |       |    |            |    |                      |                                                                                                       |                                                                                                                                                                                                                          |                                                                                  |
|-----------------------------------------------------------------------|-------|----|------------|----|----------------------|-------------------------------------------------------------------------------------------------------|--------------------------------------------------------------------------------------------------------------------------------------------------------------------------------------------------------------------------|----------------------------------------------------------------------------------|
| Eren, 2020<br>(10.1038/s41598-020-68149-1)                            | n=49  | CM | 155 UI     | 3  | ≥30% fewer MMD       | None                                                                                                  | N/A                                                                                                                                                                                                                      | Triptan efficacy                                                                 |
| Domínguez Vivero, 2020<br>(doi.org/10.3390/toxins12080479)            | n=62  | CM | 155 UI     | 3  | ≥50% fewer headaches | Age, CGRP levels (> 50 ng/mL), Pentraxin 3 (PTX3) levels (>1000 pg/ml), iron deposition in GP and PAG | mean age difference = 12.2; 95% confidence interval (CI): 5.4–18.9, p = 0.001<br>CGRP mean difference = 805.0; 95% CI: 37.9–1572.1 μL, p = 0.040<br>PTX3 mean difference = 69.8; 95% CI: 31.0–108.6 μL, p = 0.008;       | Gender, BMI, smoking, headache phenotype, allodynia, presence or location of WML |
| Moreno-Mayordomo, 2019<br>(10.1186/s10194-019-0989-9.)                | n=156 | CM | 155 UI     | 6  | ≥50% fewer MMD       | Polymorphisms :<br>-CALCA rs3781719<br>- TRPV1 rs222749                                               | p = 0.007, OR = 3.11 (1.33-7.26) and (p = 0.013, OR = 3.29 (1.28-8.43) respectively                                                                                                                                      | 23 other SNPs                                                                    |
| Schiano di Cola, 2019<br>(10.3389/fneur.2019.00678. eCollection 2019) | n=84  | CM | 155-195 UI | 12 | ≥50% fewer headaches | Depressive symptoms, MOH                                                                              | N/A                                                                                                                                                                                                                      | N/A                                                                              |
| de Tommaso, 2019<br>(10.1159/000499764.)                              | n=120 | CM | 155-195 UI | 24 | ≥50% fewer headaches | Less severe allodynia                                                                                 | relationship between allodynia severity at T0 and reduced headache frequency change at T1 (r = 0.22) and T2 (r = 0.37)                                                                                                   | N/A                                                                              |
| Young, 2019 (doi.org/10.1186/s10194-018-0952-1)                       | n=175 | CM | 155 UI     | 27 | Mean reduction MHD   | Absence allodynia                                                                                     | Mean reduction in MMD was significantly greater in patients without allodynia (P=0.044 between-subgroup comparison)                                                                                                      | N/A                                                                              |
| Domínguez, 2018 (10.1111/head.13211.)                                 | n=62  | CM | 155 UI     | 6  | ≥50% fewer headaches | CGRP levels, PTX3 levels                                                                              | PTX3 serum levels (1455.4 ± 487.5 pg/mL versus 720.3 ± 334.1 pg/mL, P < .0001) and CGRP serum levels (133.1 ± 86.6 ng/mL versus 58.2 ± 91.7 ng/mL, P = .004) were significantly higher in responders than nonresponders. | TNF-a, IL-10, IL-6, hs-CRP, cFn, S100, NSE,                                      |

|                                                     |       |    |            |    |                           |                                                                                                         |                                                                                                                                                                                                                                                                                                                                                                                                                                                                                                                                                                                                                                                                                                   |                                                      |
|-----------------------------------------------------|-------|----|------------|----|---------------------------|---------------------------------------------------------------------------------------------------------|---------------------------------------------------------------------------------------------------------------------------------------------------------------------------------------------------------------------------------------------------------------------------------------------------------------------------------------------------------------------------------------------------------------------------------------------------------------------------------------------------------------------------------------------------------------------------------------------------------------------------------------------------------------------------------------------------|------------------------------------------------------|
| Domínguez, 2018<br>(doi.org/10.1111/ene.13523)      | n=725 | CM | 155 UI     | 12 | ≥50% fewer headaches      | CM duration, Unilateral pain, combined symptomatic treatment, fewer days of disability, milder headache | Correlation analysis of data showed that patients with a shorter duration of disease ( $r=-0.108$ ; $p=0.004$ ), those who had less days of disability per month ( $r=-0.144$ ; $p=0.001$ ), and a milder headache ( $r=-0.098$ ; $p=0.008$ ) had more chances of responding to treatment with OnabotulinumtoxinA. Conversely, we found a positive correlation between unilaterality of pain and effectiveness ( $r=0.093$ ; $p=0.012$ ). The ROC analysis for duration of disease showed an area under the curve of 0.441 (CI 95% 0.388-0.493, $p=0.025$ ), suggesting that a value below 12 months of duration of CM predicts effectiveness with a sensitivity of 72% and a specificity of 78%. | Gender, Migraine with aura, depression, fibromyalgia |
| Lovati, 2018<br>(10.1007/s10072-018-3388-0.)        | n=44  | CM | 170-195 UI | 12 | ≥50% fewer MMD            | Triptan response                                                                                        | $\chi^2$ test (3 lines $\times$ 3 columns), a significant difference between groups was observed ( $p = 0.016$ ).                                                                                                                                                                                                                                                                                                                                                                                                                                                                                                                                                                                 | N/A                                                  |
| Hubbard, 2016<br>(doi.org/10.3389/fnhum.2016.00497) | n=23  | CM | 150 UI     | 6  | ≥50% fewer MHD and now EM | Cortical thickness at right SI and aINS, left ParsOp and STG                                            | anti-correlations between the SI seed and lateral occipital (LOC) and dorsomedial prefrontal cortices (DMPFC) in responders, whereas non-responders                                                                                                                                                                                                                                                                                                                                                                                                                                                                                                                                               | N/A                                                  |

|                                                             |      |    |            |     |                                                                                   |                                         |                                                                                                                                                                                                                                                                                |                                                                                                    |
|-------------------------------------------------------------|------|----|------------|-----|-----------------------------------------------------------------------------------|-----------------------------------------|--------------------------------------------------------------------------------------------------------------------------------------------------------------------------------------------------------------------------------------------------------------------------------|----------------------------------------------------------------------------------------------------|
|                                                             |      |    |            |     |                                                                                   |                                         | showed increased connectivity between the ParsOp seed and LOC                                                                                                                                                                                                                  |                                                                                                    |
| Lee, 2016<br>(doi.org/10.1016/j.jns.2016.01.054)            | n=70 | CM | 155 UI     | 1,5 | ≥50% fewer MMD,<br>≥50% fewer abortive Rx<br>OR<br>≥50% fewer mod-severe headache | Disease Duration,<br>MCA/ICA ratio      | Longer disease duration was associated with poor treatment outcome (p = 0.019). The ratio of the mean velocity of middle cerebral artery to that of ipsilateral internal carotid artery (MCA/ICA index) was significantly higher in responders than non-responders (p< 0.027). | Age, gender, BMI, concurrent prophylactic medication, MA vs. MoA, psychiatric comorbidity, smoking |
| Cernuda-Morollón, 2015<br>(10.1097/j.pain.0000000000000119) | n=83 | CM | 155-195 UI | 6   | ≥50% fewer headaches<br>AND ≥50% reduced VAS                                      | CGRP (76.85 pg/mL vs. 50.45 pg/mL), VIP | Pre-treatment CGRP levels in responders (76.85 pg/mL) were significantly higher than those seen in nonresponders (50.45 pg/mL; P < 0.001).                                                                                                                                     | Clinical features, age, duration of CM, comorbidity, obesity, prophylactic medication              |

eTable 4. Possible predictive factors for the efficacy of BoNT-A treatment following PREEMPT paradigm, adapted from Ray et al 2021 (<https://doi.org/10.3390/jcm10132898>)

Legend: CM chronic migraine; EM episodic migraine; UI international unit, MMD migraine monthly days, VAS Visual assessment score, MCA middle cerebral artery, ICA internal carotid artery, MOH medication overuse headache
